# Supplementary material
Source: PubMed Central journal article supplement (PMC8459766)
Supplement: jb.00145-21-s0002.pdf [file jb.00145-21-s0002.pdf]

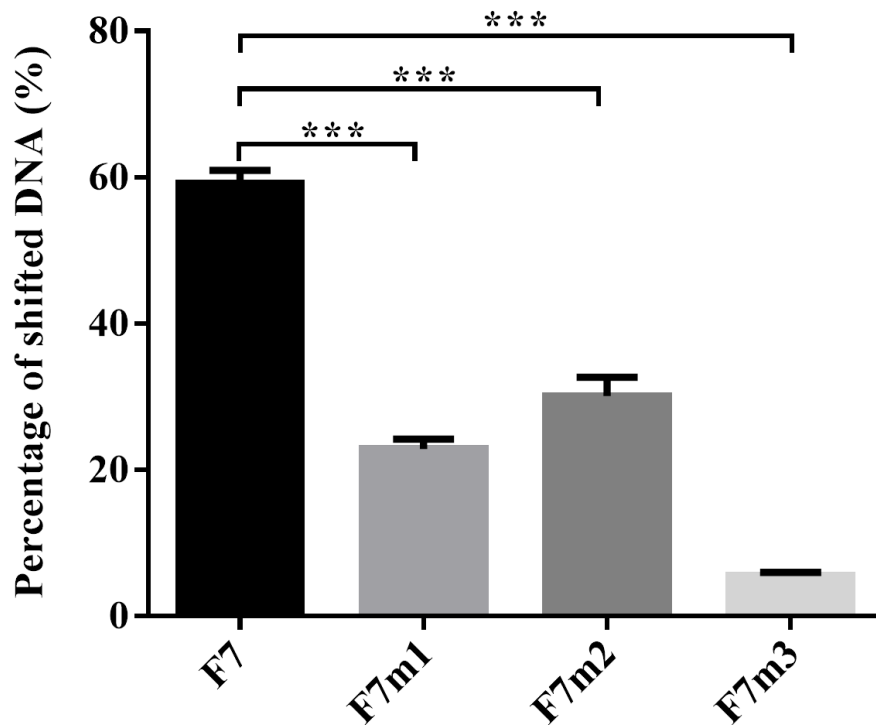

**FIG S1** Quantitation of protein-DNA binding in the gel shift assay for F7 and its three mutants. The percentage of shifted DNA was calculated as the ratio amount of shifted DNA/total amount of DNA. The amounts of DNA fragments were determined by measuring the gray values of corresponding bands via ImageJ software. \*\*\* $P < 0.001$  as determined by Student's  $t$ -test. Error bars represent standard deviation.

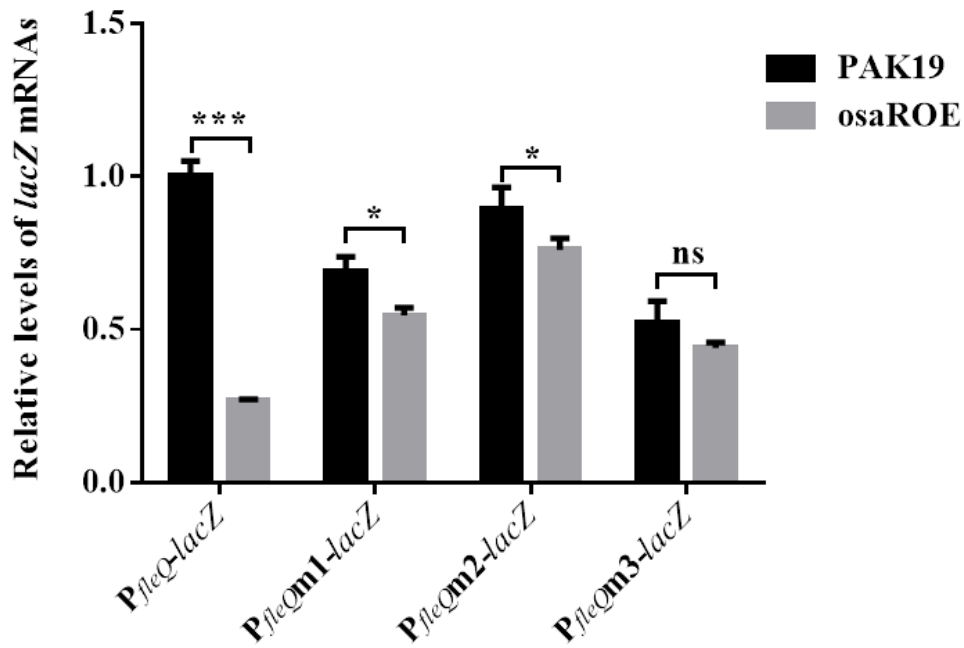

**FIG S2** *lacZ* transcription in the reporter strains. mRNA levels were determined by qRT-PCR. ns, not significant,  $*P < 0.05$  and  $***P < 0.001$  as determined by Student's *t*-test. Error bars represent standard deviation.

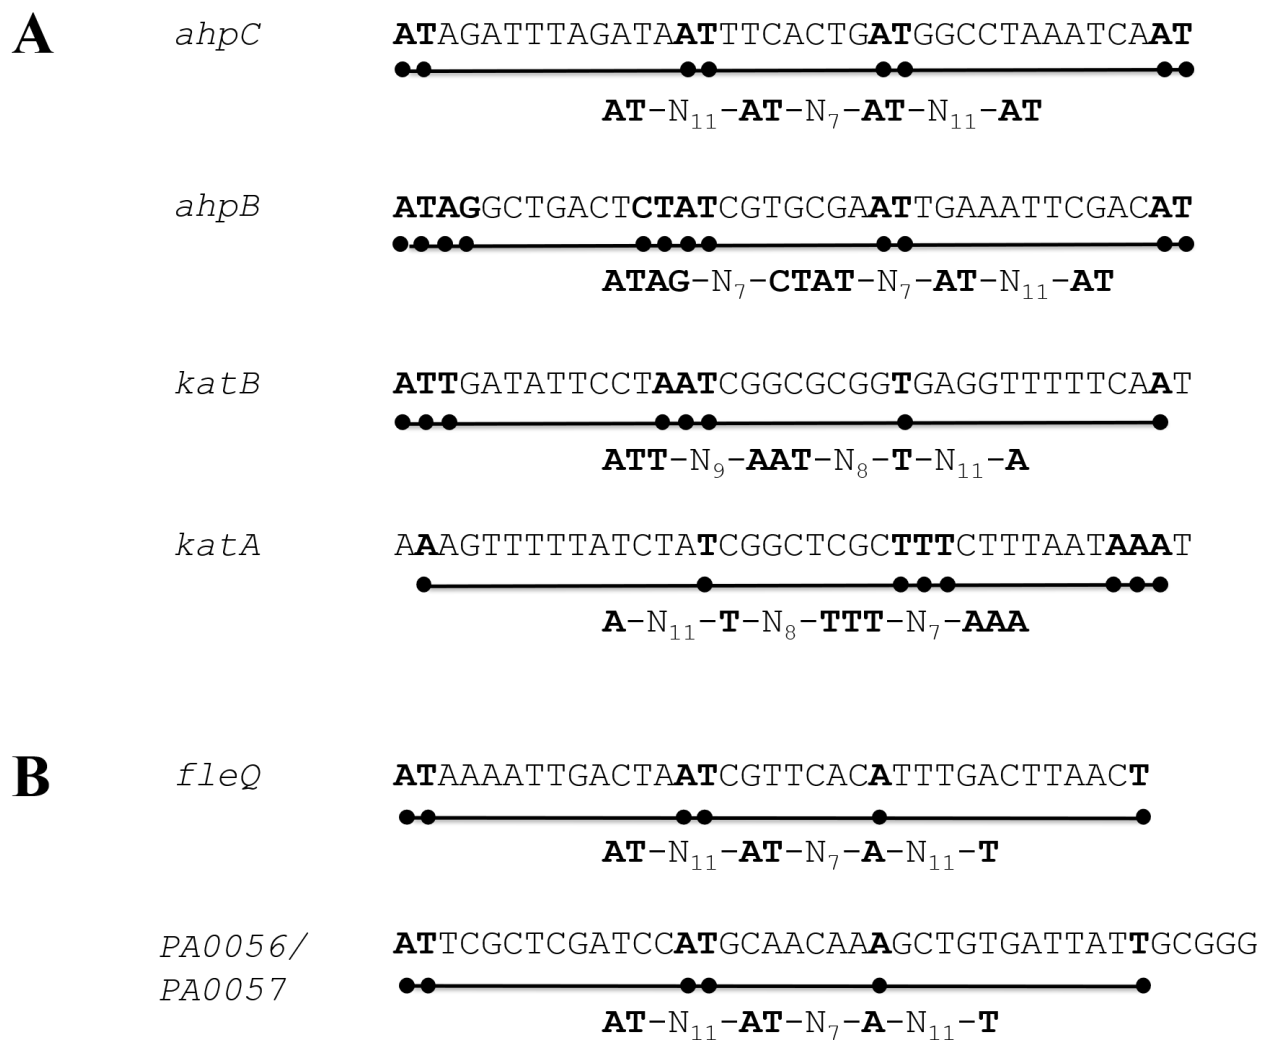

**FIG S3** Comparison of OsaR and OxyR binding sites. (A) Features of the OxyR binding sites in antioxidant genes. (B) Features of the OsaR binding site in the *fleQ* promoter and the *PA0056/PA0057* promoter. The A-T palindromic base pairs are boldfaced and indicated by dots; the spacer bases are indicated by line segments.

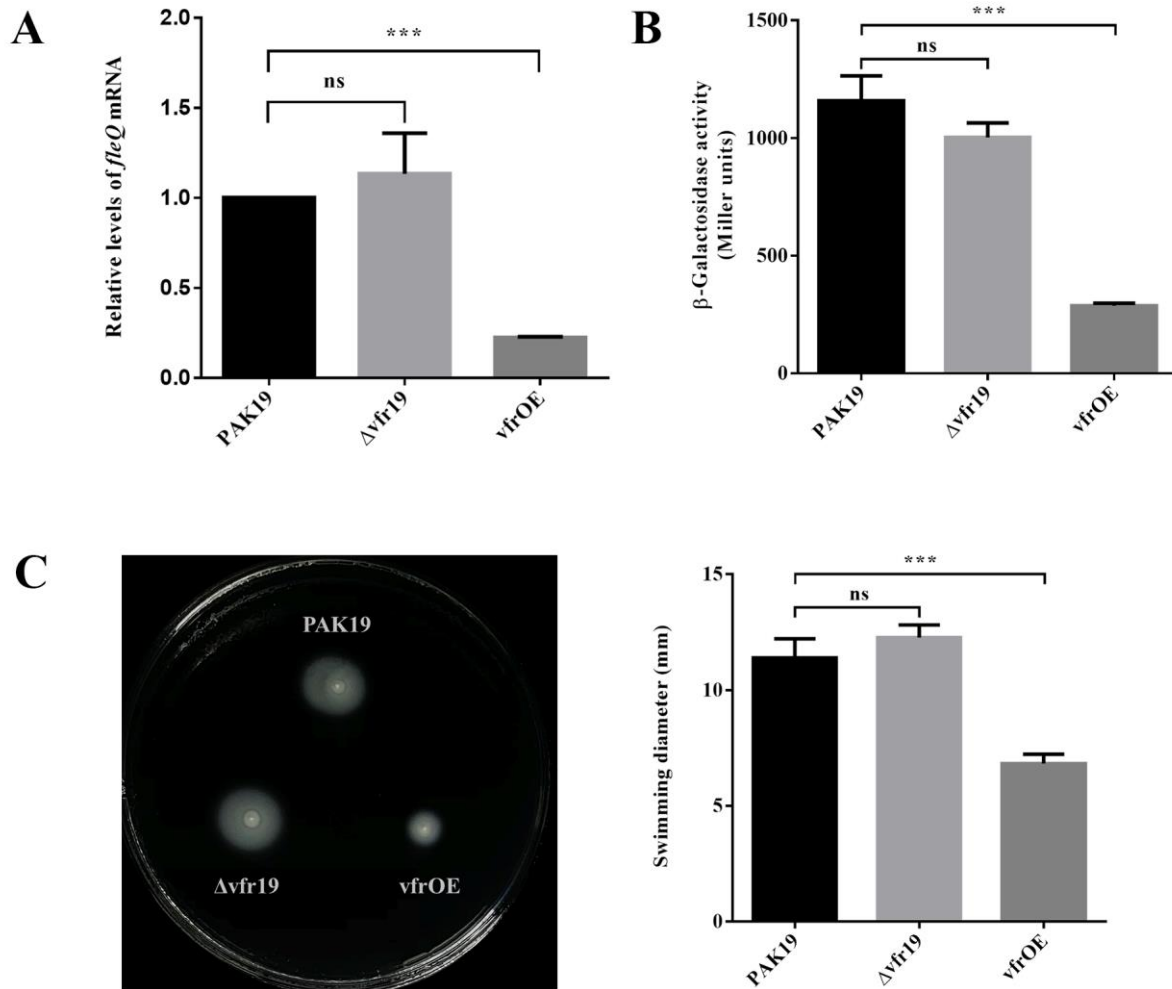

**FIG S4** *vfr* overexpression downregulates *fleQ* and swimming motility. (A) The effect of Vfr on the transcriptional level of *fleQ*. The mRNA levels of *fleQ* were determined by qRT-PCR. (B) The effect of Vfr on the promoter activity of *fleQ*. WT strain (PAK19), *vfr* mutant ( $\Delta vfr19$ ) and *osaR* overexpressing strain (*vfrOE*) were transformed with the reporter plasmid  $P_{fleQ}$ -*lacZ*, followed by  $\beta$ -galactosidase assays when cultured to an OD<sub>600</sub> of ~0.6. (C) The effect of Vfr on swimming motility. Motility was detected and quantitated by three independent replicates. ns, not significant, \*\*\*  $P < 0.001$  as determined by Student's *t*-test. Error bars represent standard deviation.

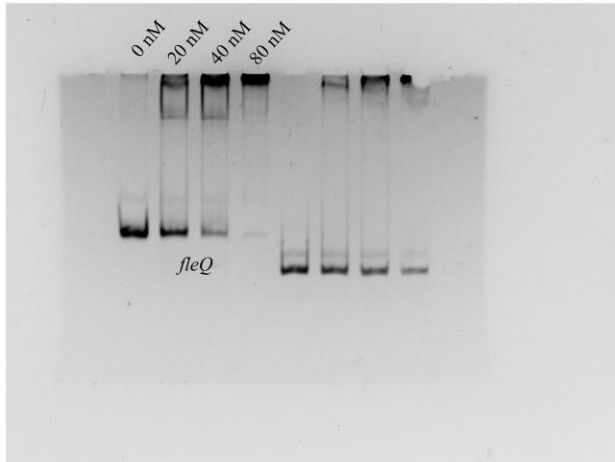

**A**

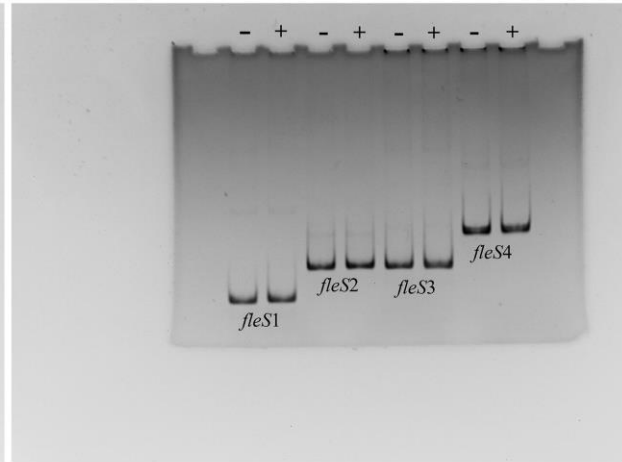

**B**

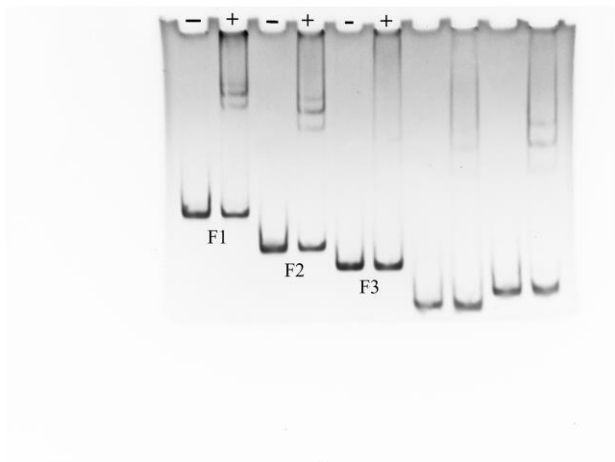

**C**

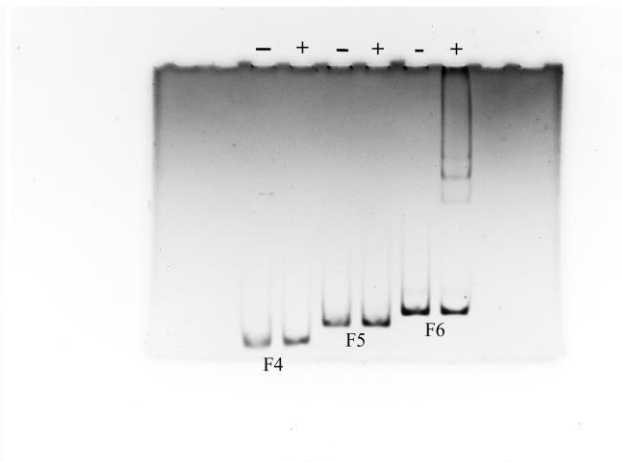

**D**

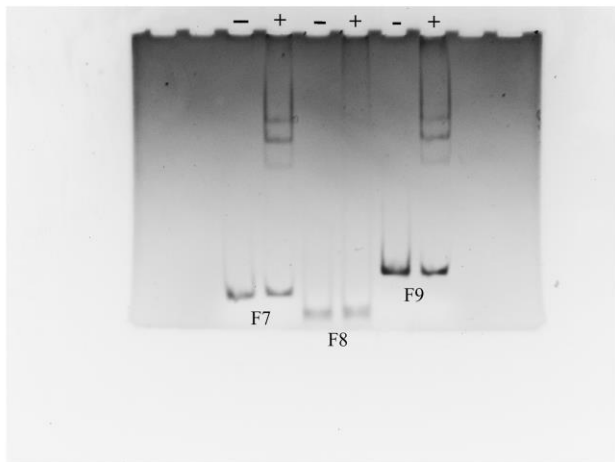

**E**

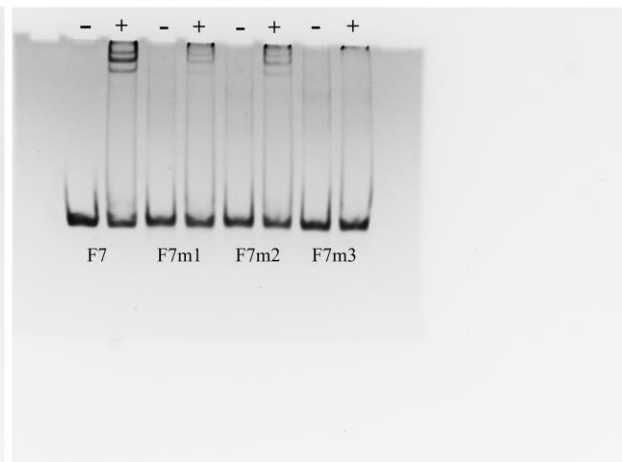

**F**

**FIG S5** Row figures of the gels presented in this study. A-B, C-E, F corresponds to Fig. 1B, Fig. 3B, Fig. 4B, respectively.
